# Supplementary material for: DNA nuclease activity of Rev-coupled transition metal chelates
Source: Royal Society of Chemistry journal article supplement (doi:10.1039/c2dt00026a), 2012-01-01
Supplement: c2dt00026a.pdf [file c2dt00026a.pdf]

## **SUPPORTING MATERIAL**

### **DNA Nuclease Activity of Rev-Coupled Transition Metal Chelates**

Jeff C. Joyner,<sup>1,2</sup> Kevin D. Keuper,<sup>1</sup> and J. A. Cowan<sup>1,2,3\*</sup>

Contribution from <sup>1</sup> Evans Laboratory of Chemistry, Ohio State University, 100 West 18th Avenue, Columbus, Ohio 43210; <sup>2</sup> The Ohio State Biochemistry Program, 784 Biological Sciences 484 W. 12th Avenue, Columbus, Ohio 43210; and <sup>3</sup> MetalloPharm LLC, 1790 Riverstone Drive, Delaware, OH 43015

Correspondence to: Dr. J. A. Cowan, Evans Laboratory of Chemistry, Ohio State University, 100 West 18th Avenue, Columbus, Ohio 43210. tel: 614-292-2703, e-mail: [cowan@chemistry.ohio-state.edu](mailto:cowan@chemistry.ohio-state.edu)

| Complex           | With Attached Rev                                          |                                                                 | Without Attached Rev                                       |                                                                 |
|-------------------|------------------------------------------------------------|-----------------------------------------------------------------|------------------------------------------------------------|-----------------------------------------------------------------|
|                   | $k_{\text{nick}}$ for DNA nicking<br>( $\text{min}^{-1}$ ) | $k_{\text{lin}}$ for DNA linearization<br>( $\text{min}^{-1}$ ) | $k_{\text{nick}}$ for DNA nicking<br>( $\text{min}^{-1}$ ) | $k_{\text{lin}}$ for DNA linearization<br>( $\text{min}^{-1}$ ) |
| <b>Fe-DOTA</b>    | $0.06 \pm 0.01$                                            | $0.0008 \pm 0.0002$                                             | — <sup>a</sup>                                             | $0.0008 \pm 0.0001$                                             |
| <b>Co-DOTA</b>    | $0.05 \pm 0.01$                                            | $0.0012 \pm 0.0002$                                             | — <sup>a</sup>                                             | $0.0005 \pm 0.0001$                                             |
| <b>Ni-DOTA</b>    | $0.016 \pm 0.004$                                          | $0.0008 \pm 0.0006$                                             | $0.030 \pm 0.007$                                          | $0.0029 \pm 0.0008$                                             |
| <b>Cu-DOTA</b>    | $0.043 \pm 0.007$                                          | $0.0025 \pm 0.0008$                                             | — <sup>a</sup>                                             | $0.0013 \pm 0.0001$                                             |
| <b>Fe-DTPA</b>    | $0.025 \pm 0.005$                                          | $0.0011 \pm 0.0002$                                             | — <sup>a</sup>                                             | $0.0012 \pm 0.0001$                                             |
| <b>Co-DTPA</b>    | $0.015 \pm 0.001$                                          | $0.0009 \pm 0.0002$                                             | — <sup>a</sup>                                             | — <sup>a</sup>                                                  |
| <b>Ni-DTPA</b>    | $0.10 \pm 0.01$                                            | $0.0021 \pm 0.0007$                                             | — <sup>a</sup>                                             | — <sup>a</sup>                                                  |
| <b>Cu-DTPA</b>    | $0.11 \pm 0.01$                                            | $0.0083 \pm 0.0008$                                             | — <sup>a</sup>                                             | — <sup>a</sup>                                                  |
| <b>Fe-EDTA</b>    | $0.07 \pm 0.02$                                            | $0.0021 \pm 0.0007$                                             | $0.044 \pm 0.009$                                          | $0.0005 \pm 0.0001$                                             |
| <b>Co-EDTA</b>    | $0.0177 \pm 0.0008$                                        | $0.005 \pm 0.003$                                               | $0.08 \pm 0.02$                                            | — <sup>a</sup>                                                  |
| <b>Ni-EDTA</b>    | $0.041 \pm 0.007$                                          | $0.0011 \pm 0.0004$                                             | $0.037 \pm 0.002$                                          | $0.00019 \pm 0.00002$                                           |
| <b>Cu-EDTA</b>    | $0.076 \pm 0.005$                                          | $0.0032 \pm 0.0007$                                             | $0.032 \pm 0.003$                                          | $0.00030 \pm 0.00003$                                           |
| <b>Co-GGH</b>     | $0.037 \pm 0.005$                                          | $0.0021 \pm 0.0002$                                             | — <sup>a</sup>                                             | $< 0.0002$                                                      |
| <b>Ni-GGH</b>     | $0.067 \pm 0.008$                                          | $0.0015 \pm 0.0007$                                             | — <sup>a</sup>                                             | — <sup>a</sup>                                                  |
| <b>Cu-GGH</b>     | $0.069 \pm 0.006$                                          | $0.0013 \pm 0.0001$                                             | $0.06 \pm 0.01$                                            | $0.0012 \pm 0.0002$                                             |
| <b>Co-KGHK</b>    | $0.03 \pm 0.01$                                            | $0.0013 \pm 0.0005$                                             | $0.014 \pm 0.002$                                          | $0.0042 \pm 0.0008$                                             |
| <b>Ni-KGHK</b>    | $0.024 \pm 0.007$                                          | $0.0016 \pm 0.0004$                                             | — <sup>a</sup>                                             | $0.0003 \pm 0.0001$                                             |
| <b>Cu-KGHK</b>    | $0.17 \pm 0.04$                                            | $0.0062 \pm 0.0006$                                             | $0.055 \pm 0.008$                                          | $0.00054 \pm 0.00004$                                           |
| <b>Fe-NTA</b>     | $0.04 \pm 0.02$                                            | $0.002 \pm 0.001$                                               | $0.05 \pm 0.01$                                            | $0.0008 \pm 0.0002$                                             |
| <b>Co-NTA</b>     | $0.04 \pm 0.04$                                            | $0.0010 \pm 0.0007$                                             | $0.1 \pm 0.1$                                              | $0.005 \pm 0.003$                                               |
| <b>Ni-NTA</b>     | $0.08 \pm 0.01$                                            | $0.0016 \pm 0.0004$                                             | — <sup>a</sup>                                             | $< 0.009$                                                       |
| <b>Cu-NTA</b>     | $0.60 \pm 0.06$                                            | $0.012 \pm 0.001$                                               | $0.148 \pm 0.007$                                          | $0.0032 \pm 0.0004$                                             |
| <b>Background</b> | $0.006 \pm 0.001$                                          | $0.00024 \pm 0.00003$                                           | $0.006 \pm 0.001$                                          | $0.00024 \pm 0.00003$                                           |

**Table SM1.** Summary of observed first-order rate constants ( $k_{\text{obs}}$ ) for consecutive DNA nicking ( $k_{\text{nick}}$ ) and subsequent linearization ( $k_{\text{lin}}$ ) by each M-chelate-Rev complex (this work) and by each M-chelate lacking Rev (Joyner et al., 2011),<sup>1</sup> arranged by chelating species (arranged by metal in the main manuscript). <sup>a</sup> Below detection limit ( $0.0097 \text{ min}^{-1}$  for nicking;  $0.00033 \text{ min}^{-1}$  for linearization).

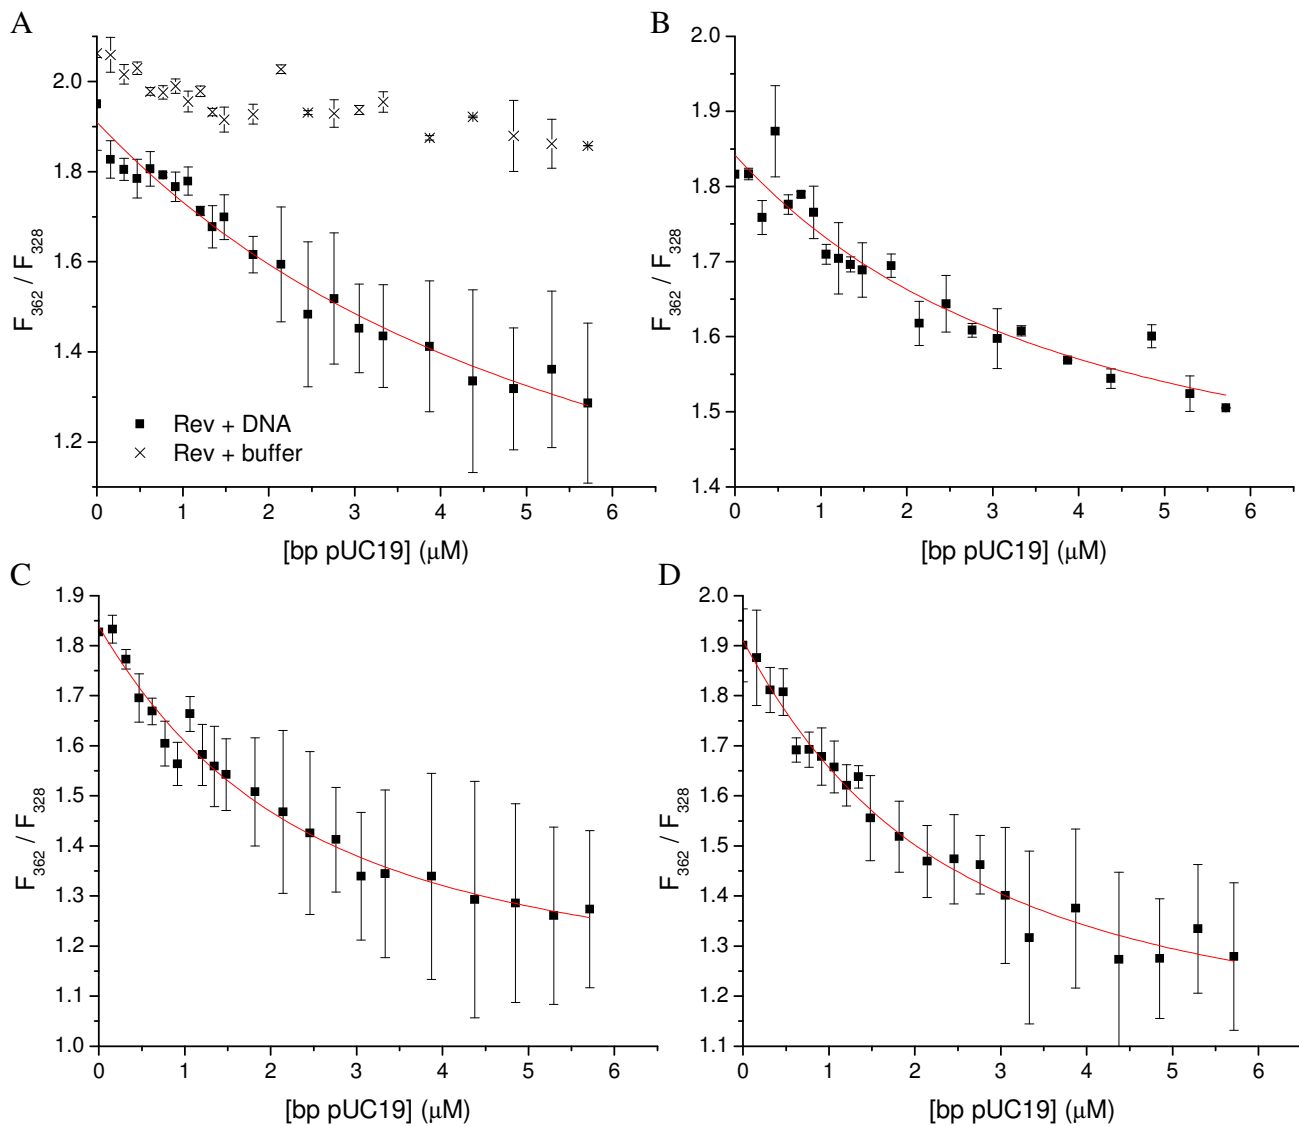

**Figure SM1.** Titration response curves for (A) titration of 500  $\mu\text{L}$  1  $\mu\text{M}$  Rev peptide with either a solution containing 20  $\mu\text{M}$  base pairs supercoiled pUC19 plasmid DNA or with a control solution containing only buffer, (B) titration of 500  $\mu\text{L}$  1  $\mu\text{M}$  Ni-DOTA-Rev with a solution containing 20  $\mu\text{M}$  base pairs supercoiled pUC19 plasmid DNA, (C) titration of 500  $\mu\text{L}$  1  $\mu\text{M}$  Ni-DTPA-Rev with a solution containing 20  $\mu\text{M}$  base pairs supercoiled pUC19 plasmid DNA, and (D) titration of 500  $\mu\text{L}$  1  $\mu\text{M}$  Ni-EDTA-Rev with a solution containing 20  $\mu\text{M}$  base pairs supercoiled pUC19 plasmid DNA. All titrations were performed in a binding buffer containing 20 mM HEPES, 100 mM NaCl, pH 7.4 at 37  $^{\circ}\text{C}$ .

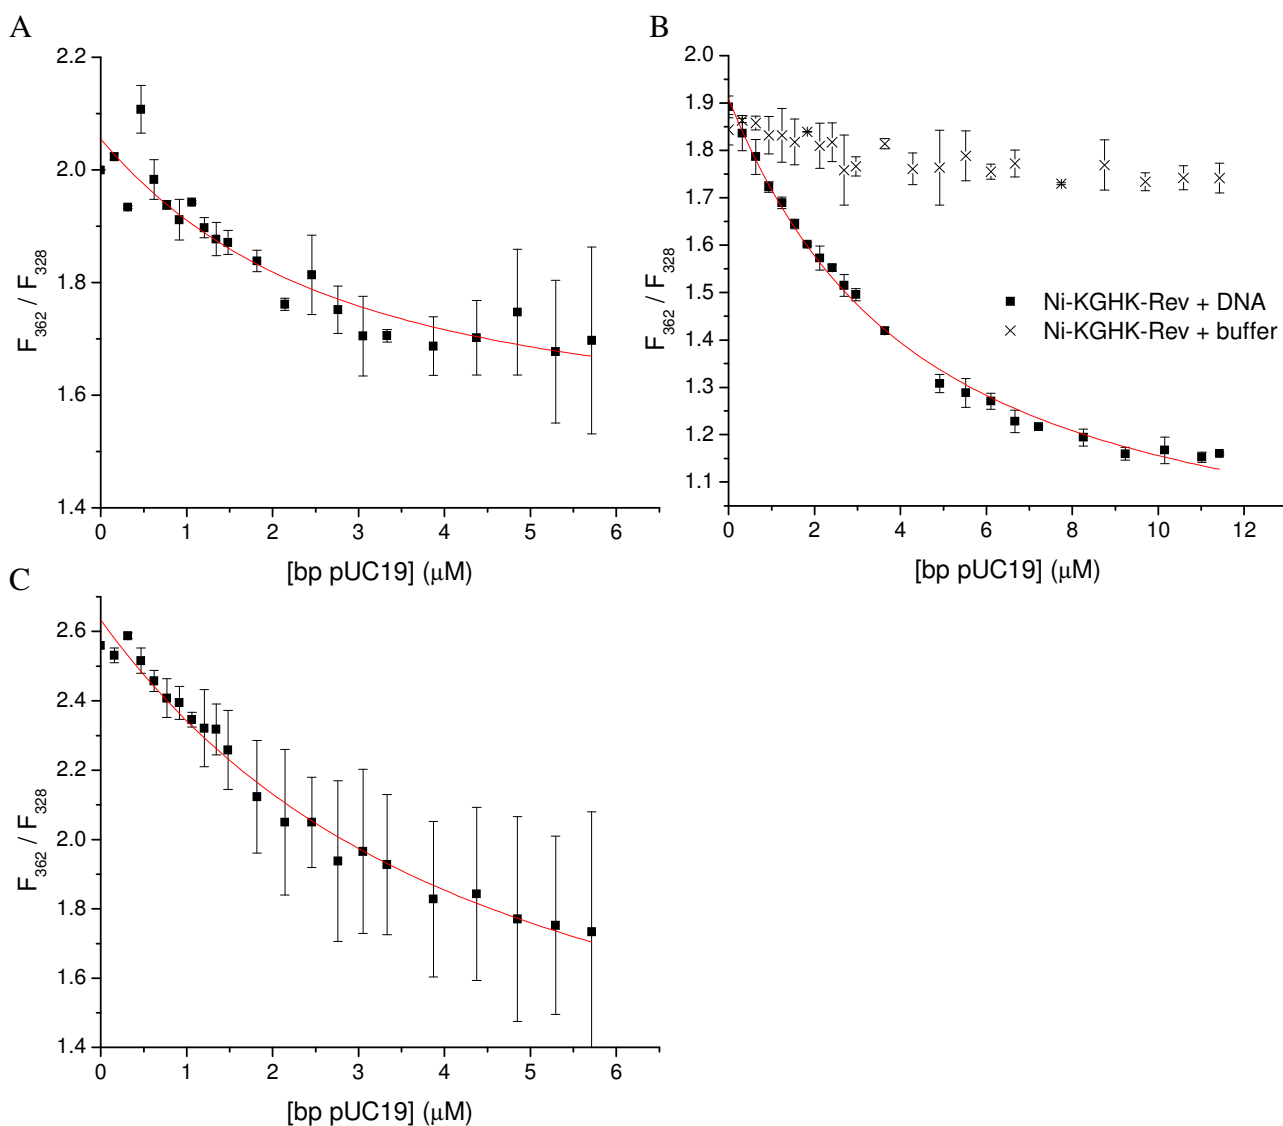

**Figure SM2.** Titration response curves for (A) titration of 500  $\mu\text{L}$  1  $\mu\text{M}$  Ni-GGH-Rev with a solution containing 20  $\mu\text{M}$  base pairs supercoiled pUC19 plasmid DNA, (B) titration of 500  $\mu\text{L}$  1  $\mu\text{M}$  Ni-KGHK-Rev with either a solution containing 40  $\mu\text{M}$  base pairs supercoiled pUC19 plasmid DNA or a control solution containing only buffer, and (C) titration of 500  $\mu\text{L}$  1  $\mu\text{M}$  Ni-NTA-Rev with a solution containing 20  $\mu\text{M}$  base pairs supercoiled pUC19 plasmid DNA. All titrations were performed in a binding buffer containing 20 mM HEPES, 100 mM NaCl, pH 7.4 at 37  $^{\circ}\text{C}$ .

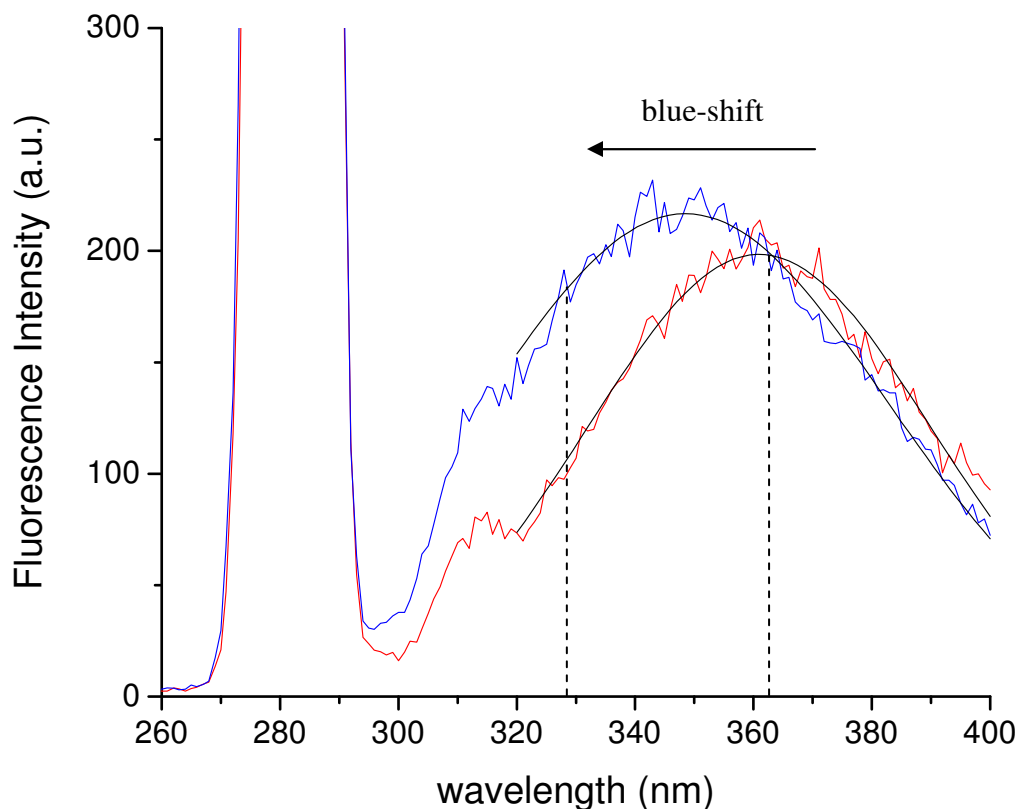

**Figure SM3.** Fluorescence emission spectra for the beginning (red) and end (blue) of a titration of 1  $\mu\text{M}$  Rev peptide with supercoiled pUC19 plasmid DNA. A blue-shift in tryptophan fluorescence, with a shift in  $\lambda_{\text{max}}$  from  $\sim 361$  nm to  $\sim 349$  nm (peaks fit to Gaussian equations), was observed upon binding of DNA. The fluorescence intensities at 362 nm and 328 nm (marked by dashed lines above) were recorded at each point during each titration of Rev and M-chelate-Rev complexes with supercoiled pUC19 plasmid DNA. The ratio of these intensities ( $F_{362}/F_{328}$ ), which decreased upon binding of DNA, provided a measure of the extent of binding. The observed blue-shift in tryptophan fluorescence occurred most likely as a result of decreased solvent exposure of the tryptophan upon Rev/DNA complex formation, consistent with previous reports of blue-shifts in tryptophan fluorescence following reduction of the dielectric constant (decreased solvent exposure) within the surrounding microenvironment.<sup>2-4</sup>

| Complex    | $n_2/n_1$ with attached Rev | $n_2/n_1$ without attached Rev <sup>1</sup> | $k_{lin}/k_{nick}$ with attached Rev | $k_{lin}/k_{nick}$ without attached Rev <sup>1</sup> | IC <sub>50</sub> (mM DMSO) with attached Rev |
|------------|-----------------------------|---------------------------------------------|--------------------------------------|------------------------------------------------------|----------------------------------------------|
| Fe-DOTA    | 0.018 ± 0.007               | ~ 0                                         | 0.014 ± 0.004                        | ~ 0                                                  | 30 ± 50                                      |
| Co-DOTA    | 0.021 ± 0.003               | ~ 0                                         | 0.023 ± 0.006                        | 0.13 ± 0.02                                          | 400 ± 700                                    |
| Ni-DOTA    | 0.021 ± 0.006               | 0.05 ± 0.01                                 | 0.05 ± 0.04                          | 0.10 ± 0.05                                          | 800 ± 600                                    |
| Cu-DOTA    | 0.015 ± 0.005               | ~ 0                                         | 0.06 ± 0.02                          | ~ 0                                                  | 200 ± 700                                    |
| Fe-DTPA    | 0.037 ± 0.003               | ~ 0                                         | 0.05 ± 0.01                          | ~ 0                                                  | <5000                                        |
| Co-DTPA    | ~0.04                       | ~ 0                                         | 0.06 ± 0.01                          | ~ 0                                                  | 1100 ± 700                                   |
| Ni-DTPA    | ~0                          | ~ 0                                         | 0.020 ± 0.007                        | ~ 0                                                  | 7 ± 7                                        |
| Cu-DTPA    | 0.103 ± 0.005               | ~ 0                                         | 0.073 ± 0.009                        | ~ 0                                                  | 2000 ± 3000                                  |
| Fe-EDTA    | 0.045 ± 0.005               | 0.03 ± 0.02                                 | 0.03 ± 0.01                          | 0.01 ± 0.05                                          | 1400 ± 500                                   |
| Co-EDTA    | 0.10 ± 0.02                 | ~ 0                                         | 0.3 ± 0.2                            | ~ 0                                                  | 3000 ± 9000                                  |
| Ni-EDTA    | 0.034 ± 0.005               | 0.0073 ± 0.0001                             | 0.03 ± 0.01                          | 0.01 ± 0.02                                          | 10 ± 10                                      |
| Cu-EDTA    | ~0.06                       | 0.01 ± 0.01                                 | 0.043 ± 0.009                        | 0.01 ± 0.02                                          | 500 ± 100                                    |
| Co-GGH     | 0.060 ± 0.006               | ~ 0                                         | 0.057 ± 0.008                        | ~ 0                                                  | 1400 ± 900                                   |
| Ni-GGH     | 0.028 ± 0.009               | ~ 0                                         | 0.02 ± 0.01                          | ~ 0                                                  | 500 ± 300                                    |
| Cu-GGH     | 0.0150 ± 0.0001             | 0.01 ± 0.01                                 | 0.019 ± 0.002                        | 0.02 ± 0.03                                          | 540 ± 90                                     |
| Co-KGHK    | 0.039 ± 0.008               | 0.11 ± .03                                  | 0.04 ± 0.02                          | 0.30 ± 0.03                                          | 900 ± 400                                    |
| Ni-KGHK    | 0.042 ± 0.008               | ~ 0                                         | 0.07 ± 0.02                          | 0.03 ± 0.05                                          | 310 ± 50                                     |
| Cu-KGHK    | ~0                          | 0.017 ± .005                                | 0.036 ± 0.009                        | 0.01 ± 0.02                                          | 2000 ± 4000                                  |
| Fe-NTA     | 0.01 ± 0.01                 | 0.03 ± 0.01                                 | 0.04 ± 0.03                          | 0.02 ± 0.05                                          | 7000 ± 1000                                  |
| Co-NTA     | 0.11 ± 0.03                 | ~ 0                                         | 0.02 ± 0.03                          | < 0.2                                                | 70 ± 60                                      |
| Ni-NTA     | 0.07 ± 0.02                 | ~ 0                                         | 0.021 ± 0.006                        | ~ 0                                                  | 1000 ± 200                                   |
| Cu-NTA     | 0.010 ± 0.005               | 0.016 ± .003                                | 0.022 ± 0.002                        | 0.02 ± 0.02                                          | >>1000                                       |
| Background | ~0                          | ~ 0                                         | 0.03 ± 0.02                          | 0.03 ± 0.02                                          | 180 ± 50                                     |

**Table SM2.** Summary of  $n_2/n_1$  and  $k_{lin}/k_{nick}$  ratios for M-chelate-Rev complexes (this work) and M-chelates lacking Rev (Joyner et al., 2011),<sup>1</sup> which provides a relative measure of the concertedness of nicking and linearization for each reaction. IC<sub>50</sub> values for DMSO inhibition of DNA cleavage by M-chelate-Rev complexes and coreactants are also shown. Attachment to Rev generally provided higher  $n_2/n_1$  and/or  $k_{lin}/k_{nick}$  ratios, which were attributed to tighter DNA binding, although in a limited number of cases, attachment to Rev actually decreased these ratios; this decrease was attributed to Rev-induced geometric/steric constraint of the metal center, relative to the DNA backbone.



| complex    | ascorbate consumption rate with co-reactants ( $\mu\text{M}/\text{min}$ ) <sup>1</sup> |                            | TEMPO reaction rate with co-reactants ( $\mu\text{M}/\text{min}$ ) <sup>1</sup> |                            | reduction potential vs. NHE for M-chelate (mV) <sup>5</sup> |
|------------|----------------------------------------------------------------------------------------|----------------------------|---------------------------------------------------------------------------------|----------------------------|-------------------------------------------------------------|
|            | reaction with $\text{H}_2\text{O}_2$                                                   | reaction with $\text{O}_2$ | reaction with $\text{H}_2\text{O}_2$                                            | reaction with $\text{O}_2$ |                                                             |
| Fe-DOTA    | — <sup>a</sup>                                                                         | — <sup>a</sup>             | $0.0601 \pm 0.0005$                                                             | — <sup>a</sup>             | 396                                                         |
| Fe-DTPA    | — <sup>a</sup>                                                                         | — <sup>a</sup>             | $0.0185 \pm 0.0005$                                                             | — <sup>a</sup>             | 280                                                         |
| Fe-EDTA    | $80 \pm 10$                                                                            | $6.9 \pm 0.2$              | $0.078 \pm 0.001$                                                               | $0.0222 \pm 0.0006$        | 391                                                         |
| Fe-NTA     | $130 \pm 20$                                                                           | $4.15 \pm 0.04$            | $0.145 \pm 0.002$                                                               | $0.0449 \pm 0.0005$        | 464                                                         |
| Co-DOTA    | — <sup>a</sup>                                                                         | — <sup>a</sup>             | — <sup>a</sup>                                                                  | — <sup>a</sup>             | 142                                                         |
| Co-DTPA    | — <sup>a</sup>                                                                         | — <sup>a</sup>             | — <sup>a</sup>                                                                  | — <sup>a</sup>             | 1111                                                        |
| Co-EDTA    | — <sup>a</sup>                                                                         | — <sup>a</sup>             | $0.0185 \pm 0.0003$                                                             | — <sup>a</sup>             | 146                                                         |
| Co-GGH     | $0.5 \pm 0.2$                                                                          | $4.9 \pm 0.1$              | — <sup>a</sup>                                                                  | — <sup>a</sup>             | -119                                                        |
| Co-KGHK    | $0.5 \pm 0.2$                                                                          | $7.1 \pm 0.2$              | — <sup>a</sup>                                                                  | — <sup>a</sup>             | -228                                                        |
| Co-NTA     | — <sup>a</sup>                                                                         | — <sup>a</sup>             | $0.075 \pm 0.002$                                                               | — <sup>a</sup>             | 274                                                         |
| Ni-DOTA    | — <sup>a</sup>                                                                         | — <sup>a</sup>             | — <sup>a</sup>                                                                  | — <sup>a</sup>             | -35                                                         |
| Ni-DTPA    | — <sup>a</sup>                                                                         | — <sup>a</sup>             | — <sup>a</sup>                                                                  | — <sup>a</sup>             | — <sup>b</sup>                                              |
| Ni-EDTA    | — <sup>a</sup>                                                                         | — <sup>a</sup>             | — <sup>a</sup>                                                                  | — <sup>a</sup>             | 172                                                         |
| Ni-GGH     | — <sup>a</sup>                                                                         | — <sup>a</sup>             | — <sup>a</sup>                                                                  | — <sup>a</sup>             | 1000                                                        |
| Ni-KGHK    | — <sup>a</sup>                                                                         | — <sup>a</sup>             | — <sup>a</sup>                                                                  | — <sup>a</sup>             | 1055                                                        |
| Ni-NTA     | — <sup>a</sup>                                                                         | — <sup>a</sup>             | — <sup>a</sup>                                                                  | — <sup>a</sup>             | 176                                                         |
| Cu-DOTA    | — <sup>a</sup>                                                                         | — <sup>a</sup>             | — <sup>a</sup>                                                                  | — <sup>a</sup>             | 180                                                         |
| Cu-DTPA    | — <sup>a</sup>                                                                         | — <sup>a</sup>             | — <sup>a</sup>                                                                  | — <sup>a</sup>             | 148                                                         |
| Cu-EDTA    | — <sup>a</sup>                                                                         | — <sup>a</sup>             | — <sup>a</sup>                                                                  | — <sup>a</sup>             | 47                                                          |
| Cu-GGH     | $2.72 \pm 0.08$                                                                        | — <sup>a</sup>             | — <sup>a</sup>                                                                  | — <sup>a</sup>             | 1038                                                        |
| Cu-KGHK    | — <sup>a</sup>                                                                         | — <sup>a</sup>             | — <sup>a</sup>                                                                  | — <sup>a</sup>             | 1058                                                        |
| Cu-NTA     | $0.72 \pm 0.05$                                                                        | $3.46 \pm 0.04$            | — <sup>a</sup>                                                                  | — <sup>a</sup>             | 215                                                         |
| Background | $0.6 \pm 0.6$                                                                          | $0.3 \pm 0.1$              | $0.007 \pm 0.003$                                                               | $0.0039 \pm 0.0007$        |                                                             |

**Table SM3.** Summary of initial rates of ascorbate consumption, rates of radical generation (TEMPO-9-AC reaction), and reduction potentials for M-chelates.<sup>1,5</sup> Rates listed for reactions with  $\text{H}_2\text{O}_2$  were the difference between rates for reactions with added  $\text{H}_2\text{O}_2$  and reactions without added  $\text{H}_2\text{O}_2$ , while rates listed for reactions with  $\text{O}_2$  were simply the rates observed without added  $\text{H}_2\text{O}_2$ . Redox couples are 3+/2+ for Fe, Co, Ni-ATCUN, and Cu-ATCUN complexes and 2+/1+ for all other Ni and Cu complexes. <sup>a</sup> Below detection limit. <sup>b</sup> Not determined. These data were used for the x-axis components of Figure SM5, Figure SM6, and Figure SM7 of the Supporting Information.



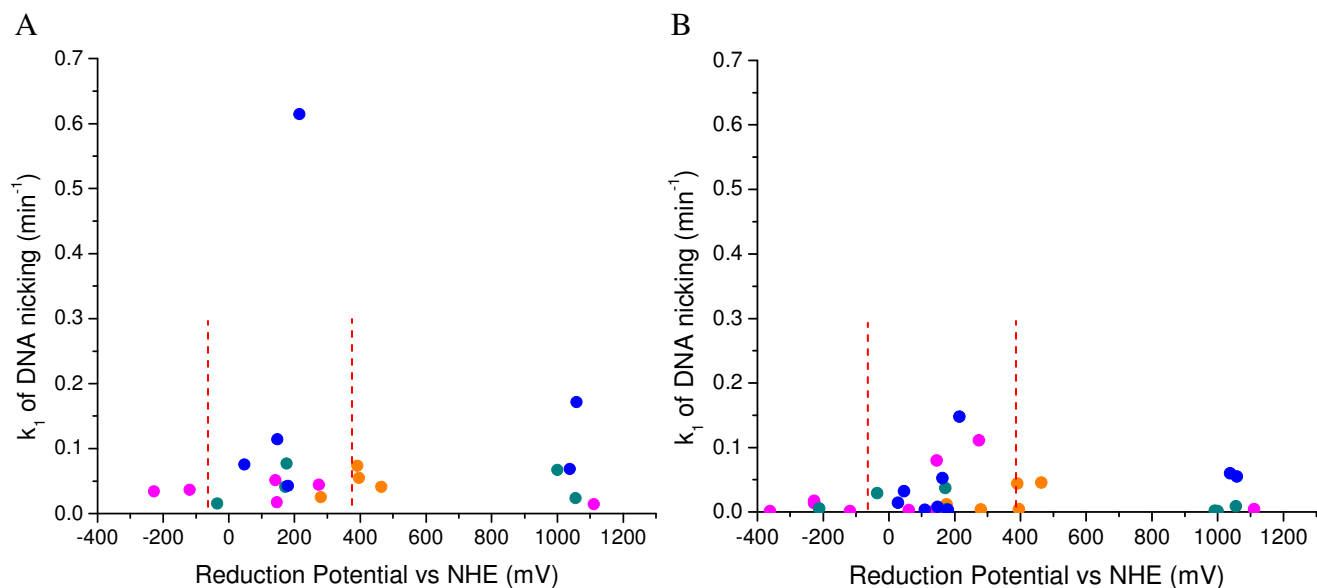

**Figure SM5.** Rate constants for DNA nicking by (A) M-chelate-Rev complexes (this work) and (B) the respective M-chelates lacking Rev (Joyner et al., 2011),<sup>1</sup> each with co-reactants H<sub>2</sub>O<sub>2</sub>/ascorbate, were highest for M-chelates with reduction potentials between (low potential region) those of ascorbyl radical/ascorbate ( $E^\circ = -66$  mV) and H<sub>2</sub>O<sub>2</sub>/hydroxyl radical ( $E^\circ = +380$  mV); modest rate constants were observed for reduction potentials near 1000 mV (high potential region). The reduction potentials for the ascorbyl radical/ascorbate ( $E^\circ = -66$  mV) and H<sub>2</sub>O<sub>2</sub>/hydroxyl radical ( $E^\circ = +380$  mV) half reactions are illustrated by the dashed lines. Orange = Fe; pink = Co; cyan/green = Ni; blue = Cu. M-chelate reduction potentials were determined previously.<sup>5</sup>

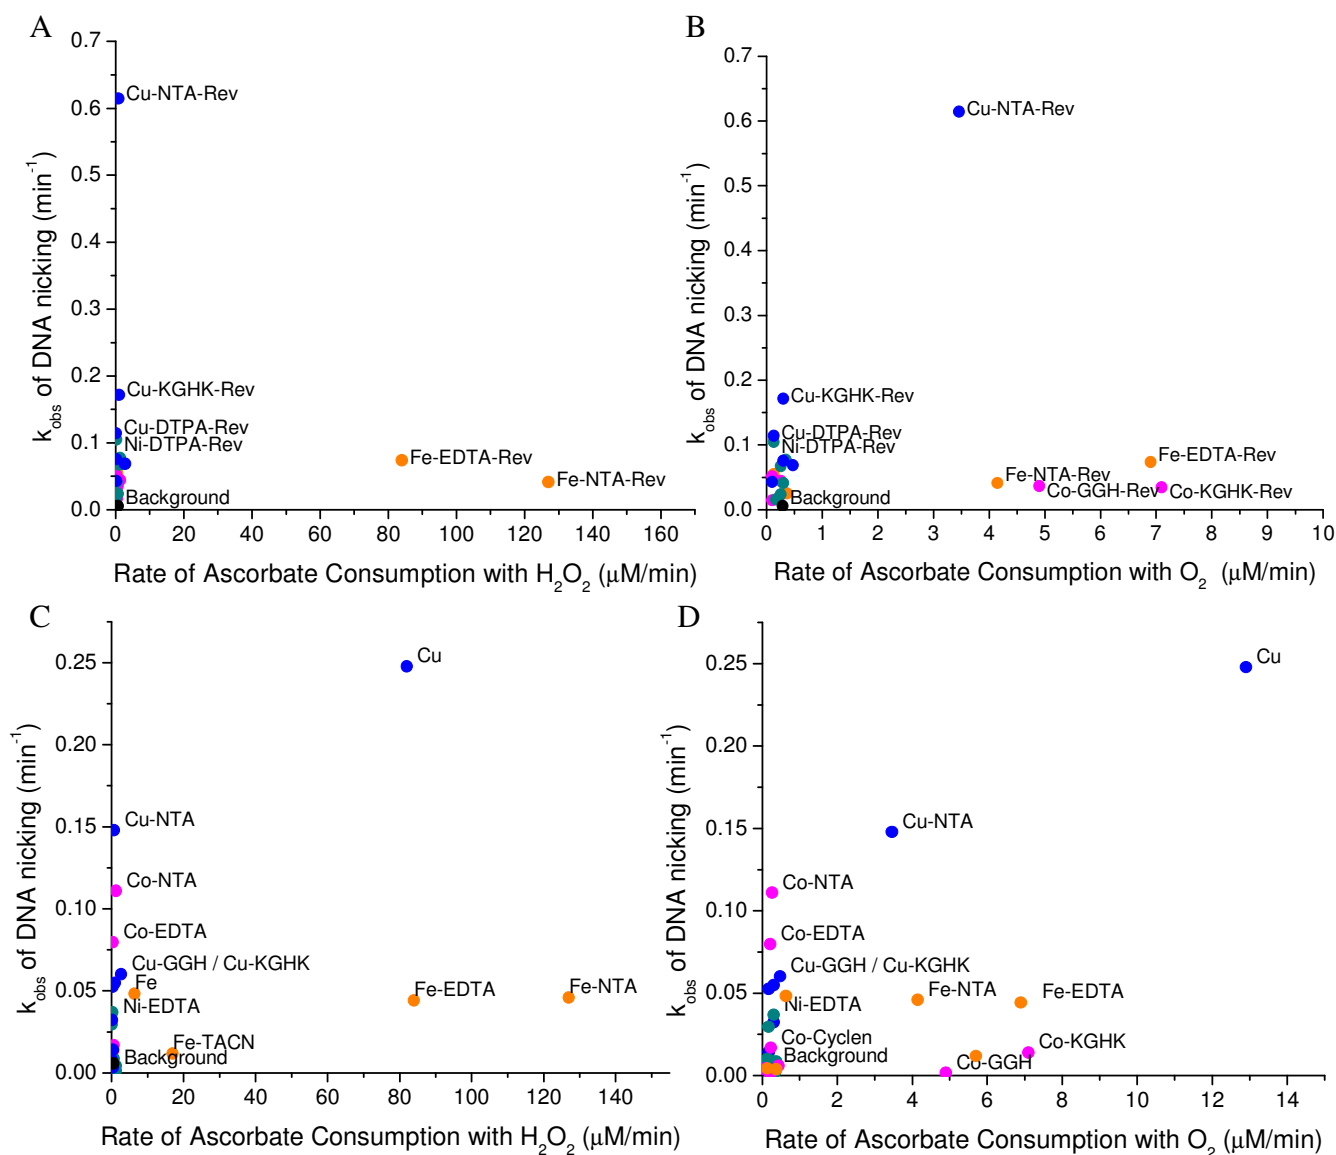

**Figure SM6.** Relationships between the rate constants for DNA nicking by M-chelate-Rev complexes and the rate for multiple turnover ascorbate consumption by respective M-chelates lacking Rev and with co-oxidants: (A) H<sub>2</sub>O<sub>2</sub> and (B) O<sub>2</sub>. Relationships between the rate constants for DNA nicking by metal complexes lacking Rev and the rate for multiple turnover ascorbate consumption by the same metal complexes and with co-oxidants: (C) H<sub>2</sub>O<sub>2</sub> and (D) O<sub>2</sub>. Orange = Fe; pink = Co; cyan/green = Ni; blue = Cu. Initial rates of ascorbate consumption (x-axes of graphs shown here) and rate constants for DNA nicking by M-chelates lacking Rev (y-axes of graphs in C and D) were determined previously.<sup>1</sup>

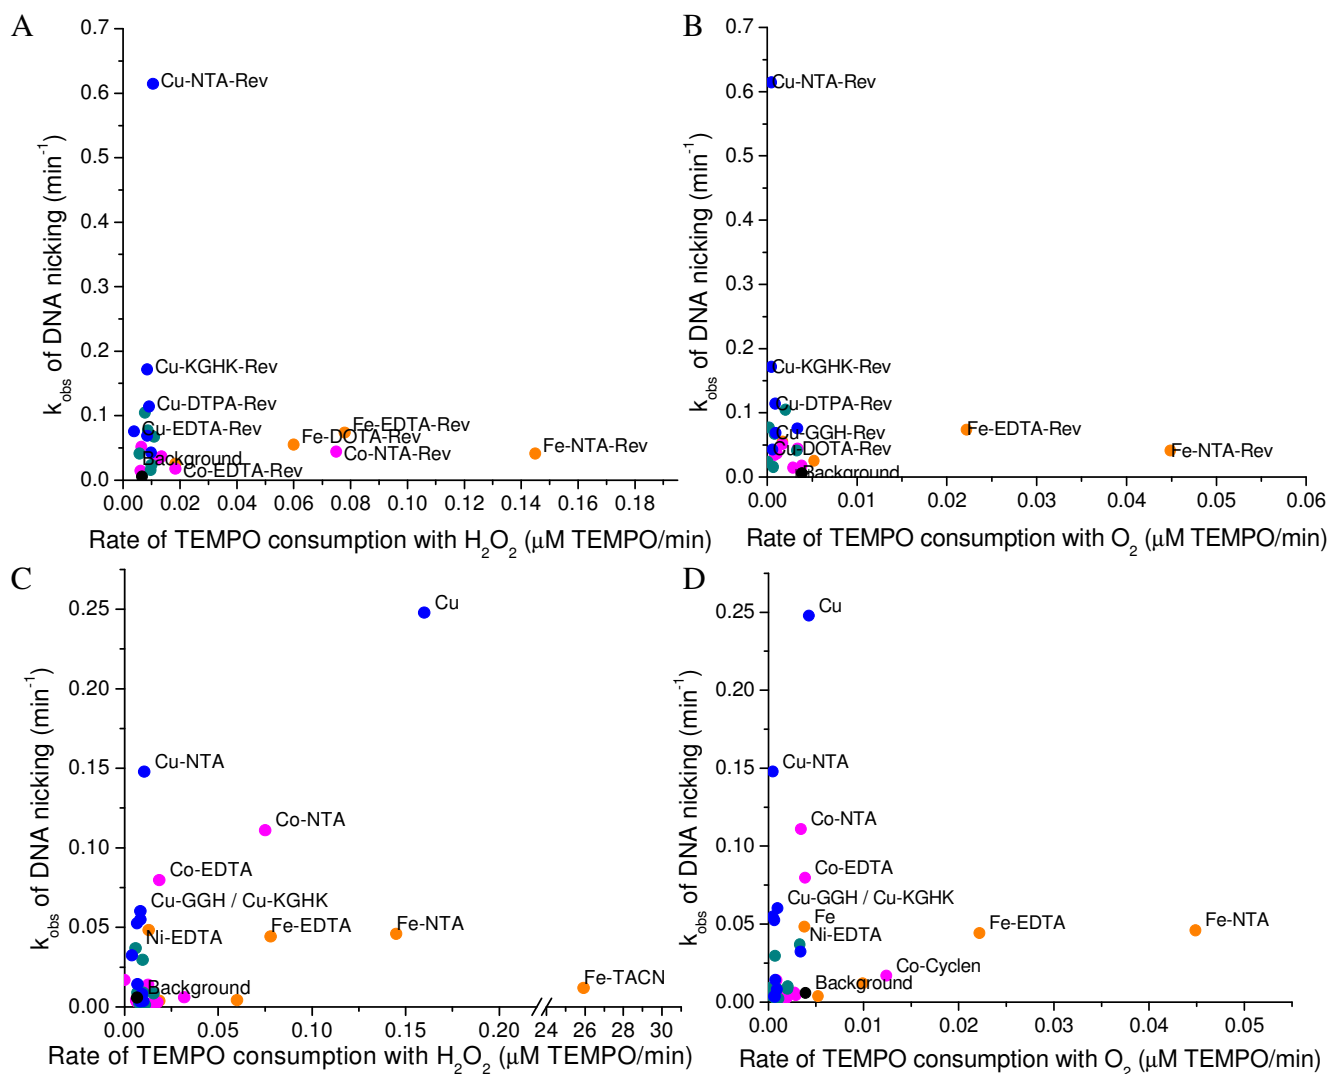

**Figure SM7.** Relationships between the rate constants for DNA nicking by M-chelate-Rev complexes and the rate of radical generation (TEMPO-9-AC reaction) by respective M-chelates lacking Rev and with co-oxidants: (A)  $\text{H}_2\text{O}_2$  and (B)  $\text{O}_2$ . Relationships between the rate constants for DNA nicking by metal complexes lacking Rev and the rate of radical generation by the same metal complexes and with co-oxidants: (C)  $\text{H}_2\text{O}_2$  and (D)  $\text{O}_2$ . Orange = Fe; pink = Co; cyan/green = Ni; blue = Cu. Rates of TEMPO-9-AC reaction (x-axes of graphs shown here) and rate constants for DNA nicking by M-chelates lacking Rev (y-axes of graphs in C and D) were determined previously.<sup>1</sup>

## **SM References**

- (1) Joyner, J. C.; Reichfield, J.; Cowan, J. A. *J. Am. Chem. Soc.* **2011**, *133*, 15613–15626.
- (2) Vivian, J. T.; Callis, P. R. *Biophys. J.* **2001**, *80*, 2093–2109.
- (3) Yuan, T.; Weljie, A. M.; Vogel, H. J. *Biochem.* **1998**, *37*, 3187-3195.
- (4) Eftink, M. R.; Ghiron, C. A. *Biochem.* **1976**, *15*, 672-680.
- (5) Joyner, J. C.; Cowan, J. A. *J. Am. Chem. Soc.* **2011**, *133*, 9912-9922.
